# Supplementary material for: An optimal posttreatment surveillance strategy for cancer survivors based on an individualized risk-based approach
Source: PubMed Central journal article supplement (PMC7400511; doi:10.1038/s41467-020-17672-w), 2020-08-03
Supplement: 41467_2020_17672_MOESM1_ESM.pdf [file 41467_2020_17672_MOESM1_ESM.pdf]

## **Supplementary Information**

# **An Optimal Post-treatment Surveillance Strategy for Cancer Survivors Based on an Individualized Risk-Based Approach**

Guan-qun Zhou et al.

## Supplementary Figures

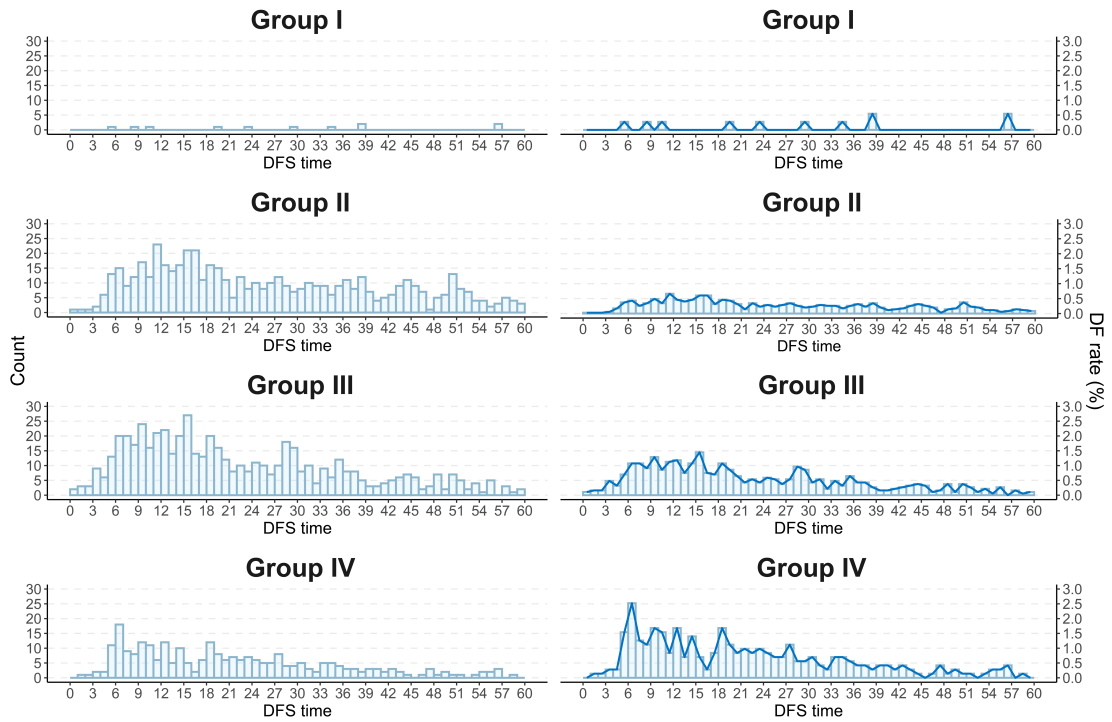

**Supplementary Figure 1. The number of disease failure events and the crude incidence month by month in the different patient groups.**

The number of disease failure events (left); the crude incidence (right). Number of patients: group I, n=367; group II, n=3,472; group III, n=1,863; group IV, n=714.

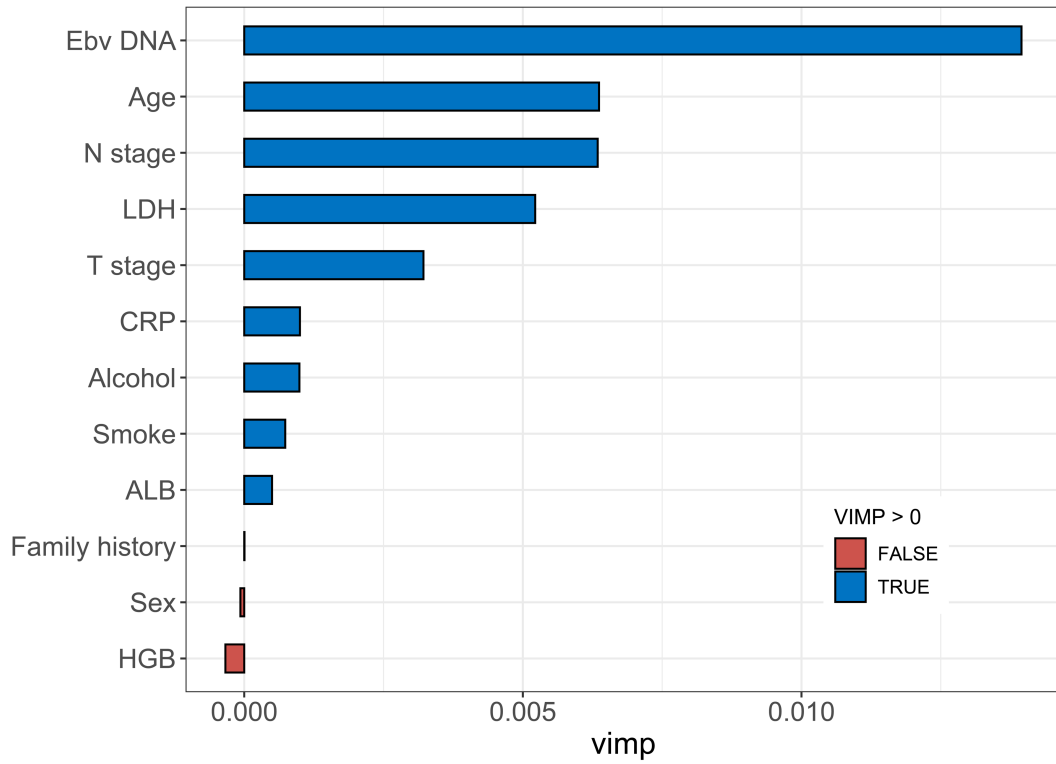

**Supplementary Figure 2. The random forest variable importance for disease failure (n=6,416).**

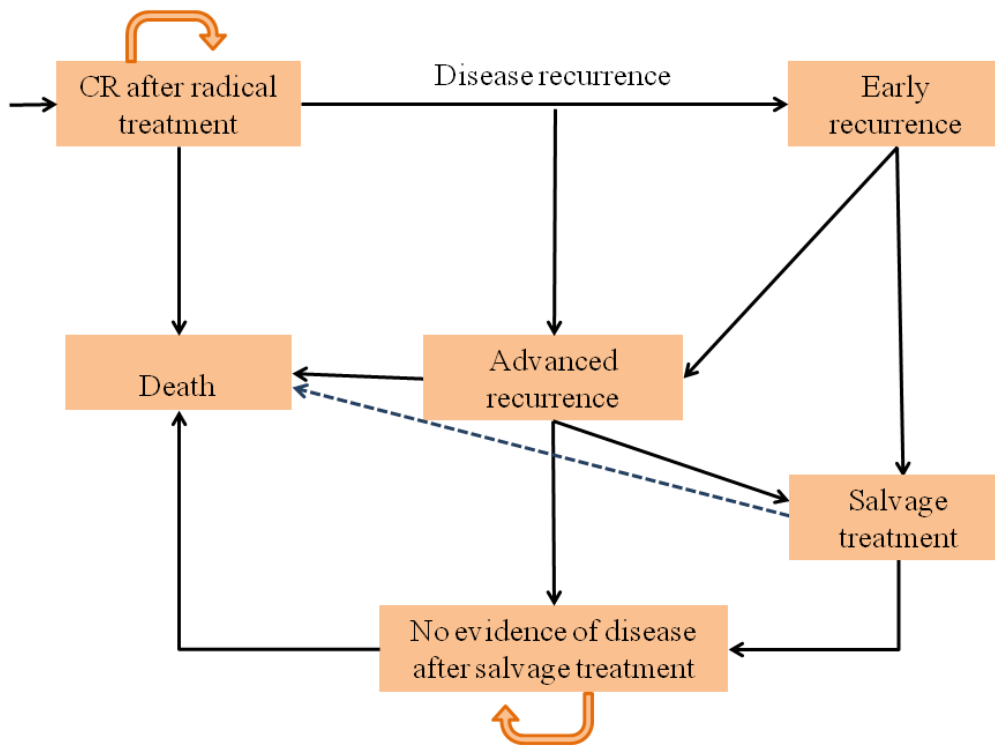

**Supplementary Figure 3. Markov model of health states for patients with nasopharyngeal carcinoma after intensity-modulated radiotherapy.**

CR, complete remission.

## Supplementary Tables

**Supplementary Table 1. Follow-up arrangements for a total of 13 visits in the patients of group III**

| <b>Month</b> | <b>Probability per month</b> | <b>Follow-ups per month</b> | <b>Cumulative follow-ups</b> | <b>Follow-up scheduled</b> |
|--------------|------------------------------|-----------------------------|------------------------------|----------------------------|
| 1            | 0                            | 0                           | 0                            | 0                          |
| 2            | 0.005526                     | 0.071841                    | 0.071841                     | 0                          |
| 3            | 0.005531                     | 0.071897                    | 0.143738                     | 0                          |
| 4            | 0.015512                     | 0.20165                     | 0.345388                     | 0                          |
| 5            | 0.011643                     | 0.151363                    | 0.49675                      | 0                          |
| 6            | 0.026589                     | 0.345655                    | 0.842405                     | 1                          |
| 7            | 0.045163                     | 0.587116                    | 1.429521                     | 0                          |
| 8            | 0.03742                      | 0.486464                    | 1.915985                     | 1                          |
| 9            | 0.033752                     | 0.438777                    | 2.354762                     | 0                          |
| 10           | 0.047574                     | 0.618465                    | 2.973227                     | 1                          |
| 11           | 0.031506                     | 0.409576                    | 3.382802                     | 0                          |
| 12           | 0.036826                     | 0.478741                    | 3.861543                     | 1                          |
| 13           | 0.041297                     | 0.536865                    | 4.398408                     | 0                          |
| 14           | 0.025025                     | 0.325328                    | 4.723736                     | 1                          |
| 15           | 0.03551                      | 0.461636                    | 5.185372                     | 0                          |
| 16           | 0.043128                     | 0.560664                    | 5.746036                     | 1                          |
| 17           | 0.021956                     | 0.285426                    | 6.031462                     | 0                          |
| 18           | 0.023226                     | 0.301939                    | 6.333401                     | 0                          |
| 19           | 0.036375                     | 0.472877                    | 6.806278                     | 1                          |
| 20           | 0.028038                     | 0.364488                    | 7.170766                     | 0                          |
| 21           | 0.020612                     | 0.26796                     | 7.438725                     | 0                          |
| 22           | 0.015779                     | 0.205124                    | 7.643849                     | 0                          |
| 23           | 0.017531                     | 0.227904                    | 7.871754                     | 1                          |

|    |          |          |          |   |
|----|----------|----------|----------|---|
| 24 | 0.016015 | 0.208201 | 8.079955 | 0 |
| 25 | 0.019207 | 0.24969  | 8.329646 | 0 |
| 26 | 0.017201 | 0.223614 | 8.553259 | 0 |
| 27 | 0.013057 | 0.169739 | 8.722999 | 1 |
| 28 | 0.02016  | 0.262074 | 8.985073 | 0 |
| 29 | 0.02743  | 0.356595 | 9.341668 | 0 |
| 30 | 0.025725 | 0.334425 | 9.676093 | 1 |
| 31 | 0.01417  | 0.184205 | 9.860298 | 0 |
| 32 | 0.01573  | 0.204484 | 10.06478 | 0 |
| 33 | 0.006687 | 0.086932 | 10.15171 | 0 |
| 34 | 0.015404 | 0.200254 | 10.35197 | 0 |
| 35 | 0.011443 | 0.148765 | 10.50073 | 0 |
| 36 | 0.019128 | 0.248669 | 10.7494  | 1 |
| 37 | 0.012111 | 0.157448 | 10.90685 | 0 |
| 38 | 0.013166 | 0.171159 | 11.07801 | 0 |
| 39 | 0.008756 | 0.113822 | 11.19183 | 0 |
| 40 | 0.006459 | 0.083966 | 11.2758  | 0 |
| 41 | 0.00637  | 0.082813 | 11.35861 | 0 |
| 42 | 0.00701  | 0.09113  | 11.44974 | 0 |
| 43 | 0.009001 | 0.11701  | 11.56675 | 0 |
| 44 | 0.009886 | 0.128515 | 11.69526 | 1 |
| 45 | 0.011299 | 0.146887 | 11.84215 | 0 |
| 46 | 0.008599 | 0.111793 | 11.95394 | 0 |
| 47 | 0.003455 | 0.044921 | 11.99887 | 0 |
| 48 | 0.006271 | 0.081526 | 12.08039 | 0 |
| 49 | 0.012101 | 0.157313 | 12.2377  | 0 |
| 50 | 0.003482 | 0.04526  | 12.28296 | 0 |
| 51 | 0.15167  | 0.15167  | 12.43464 | 0 |
| 52 | 0.104245 | 0.104245 | 12.53888 | 1 |

|       |          |          |          |    |
|-------|----------|----------|----------|----|
| 53    | 0.046183 | 0.046183 | 12.58506 | 0  |
| 54    | 0.082151 | 0.082151 | 12.66721 | 0  |
| 55    | 0.038068 | 0.038068 | 12.70528 | 0  |
| 56    | 0.119827 | 0.119827 | 12.82511 | 0  |
| 57    | 0.028333 | 0.028333 | 12.85344 | 0  |
| 58    | 0.074934 | 0.074934 | 12.92838 | 0  |
| 59    | 0.031623 | 0.031623 | 12.96    | 0  |
| 60    | 0.04     | 0.04     | 13       | 0  |
| Total | 1.0000   | 13.0000  | \        | 13 |

**Supplementary Table 2. Cost-effectiveness analysis in the validation cohort**

|                                          | <b>Cost (\$)</b> | <b>Incremental cost (\$)</b> | <b>Effectiveness (QALYs)</b> | <b>Incremental effectiveness</b> | <b>ICER (\$/QALY)</b> |
|------------------------------------------|------------------|------------------------------|------------------------------|----------------------------------|-----------------------|
| <b>Patients in group I<sup>†</sup></b>   |                  |                              |                              |                                  |                       |
| The least intensive NCCN strategy        | 7,822            | 0                            | 36.872                       | 0                                | 0                     |
| The moderately intensive NCCN strategy   | 8,629            | 807                          | 37.356                       | 0.484                            | 1,667                 |
| The most intensive NCCN strategy         | 12,460           | 4,638                        | 37.713                       | 0.841                            | 5,515                 |
| The RTOG strategy                        | 8,672            | 850                          | 37.357                       | 0.485                            | 1,753                 |
| The risk-based strategy <sup>※</sup>     | 7,793            | -29                          | 36.924                       | 0.052                            | -558                  |
| <b>Patients in group II<sup>†</sup></b>  |                  |                              |                              |                                  |                       |
| The least intensive NCCN strategy        | 10,881           | 0                            | 32.398                       | 0                                | 0                     |
| The moderately intensive NCCN strategy   | 13,491           | 2,610                        | 33.284                       | 0.886                            | 2,946                 |
| The most intensive NCCN strategy         | 18,520           | 7,639                        | 34.076                       | 1.678                            | 4,552                 |
| The RTOG strategy                        | 13,759           | 2,878                        | 33.364                       | 0.966                            | 2,979                 |
| The risk-based strategy <sup>※</sup>     | 12,887           | 2,006                        | 33.167                       | 0.769                            | 2,609                 |
| <b>Patients in group III<sup>†</sup></b> |                  |                              |                              |                                  |                       |
| The least intensive NCCN strategy        | 15,168           | 0                            | 19.201                       | 0                                | 0                     |
| The moderately intensive NCCN strategy   | 17,412           | 2,244                        | 19.798                       | 0.597                            | 3,759                 |
| The most intensive NCCN strategy         | 20,901           | 5,733                        | 20.106                       | 0.905                            | 6,335                 |
| The RTOG strategy                        | 17,573           | 2,405                        | 19.904                       | 0.703                            | 3,421                 |
| The risk-based strategy <sup>※</sup>     | 17,174           | 2,006                        | 19.847                       | 0.646                            | 3,105                 |
| <b>Patients in group IV<sup>†</sup></b>  |                  |                              |                              |                                  |                       |



|                                        |        |       |        |       |       |
|----------------------------------------|--------|-------|--------|-------|-------|
| The least intensive NCCN strategy      | 17,155 | 0     | 17.538 | 0     | 0     |
| The moderately intensive NCCN strategy | 19,231 | 2,076 | 18.052 | 0.514 | 4,039 |
| The most intensive NCCN strategy       | 22,286 | 5,131 | 18.282 | 0.744 | 6,897 |
| The RTOG strategy                      | 18,908 | 1,753 | 18.061 | 0.523 | 3,352 |
| The risk-based strategy <sup>‡</sup>   | 18,903 | 1,748 | 18.098 | 0.56  | 3,121 |

<sup>†</sup> Patients were grouped according to TNM stages and EBV DNA.

<sup>‡</sup>The dominant strategy.

Abbreviations: QALY, quality-adjusted life years; ICER, incremental cost-effectiveness ratio; NCCN, National Comprehensive Cancer Network; RTOG, Radiation Therapy Oncology Group.

**Supplementary Table 3. Baseline clinical estimates for Markov model**

**construction**

|                                                                                                    | <b>Estimate (%)</b> | <b>Reference</b> |
|----------------------------------------------------------------------------------------------------|---------------------|------------------|
| Initial distribution of patients with recurrence                                                   |                     | Assumption       |
| Proportion of early stage in distant metastasis                                                    | 80                  |                  |
| Proportion of early stage in local recurrence                                                      | 90                  |                  |
| Proportion of early stage in regional recurrence                                                   | 90                  |                  |
| Probability of transformation to advanced stage if early recurrence if not detected within a month |                     | Assumption       |
| for distant metastasis                                                                             | 20                  |                  |
| for local recurrence                                                                               | 10                  |                  |
| for regional recurrence                                                                            | 10                  |                  |
| Survival probabilities given disease recurrence after treatment                                    |                     |                  |
| 5-year survival given early distant metastasis                                                     | 42                  | 27, 29           |
| 5-year survival given advanced distant metastasis                                                  | 14                  | 27, 29           |
| 5-year survival given early local recurrence                                                       | 48                  | 6, 30            |
| 5-year survival given advanced local recurrence                                                    | 18                  | 6, 30            |
| 5-year survival given early regional recurrence                                                    | 86                  | 26, 28           |
| 5-year survival given advanced regional recurrence                                                 | 50                  | 26, 28           |
| Survival probability given undetected disease recurrence                                           |                     | Assumption       |
| 2-year survival given early distant metastasis                                                     | 0                   |                  |
| 2-year survival given advanced distant metastasis                                                  | 0                   |                  |

|                                                                                   |        |                                                  |
|-----------------------------------------------------------------------------------|--------|--------------------------------------------------|
| 2-year survival given early local recurrence                                      | 30     |                                                  |
| 2-year survival given advanced local recurrence                                   | 10     |                                                  |
| 2-year survival given early regional recurrence                                   | 30     |                                                  |
| 2-year survival given advanced regional recurrence                                | 10     |                                                  |
| Survival probability given disease recurrence that is not detected within 3 years | 0      | Assumption                                       |
| Model costs (\$)                                                                  |        | From the Medical Insurance Administration Bureau |
| Cost of routine follow-up                                                         | 255    |                                                  |
| Cost of treatment for distant metastasis                                          | 28,986 |                                                  |
| Cost of treatment for local recurrence                                            | 13,333 |                                                  |
| Cost of treatment for regional recurrence                                         | 11,014 |                                                  |
| Model utilities                                                                   |        | 24, 25, 31                                       |
| No evidence of recurrence                                                         | 0.8    |                                                  |
| Distant metastasis                                                                | 0.4    |                                                  |
| Local recurrence                                                                  | 0.35   |                                                  |
| Regional recurrence                                                               | 0.4    |                                                  |
| CR after treatment for distant metastasis                                         | 0.55   |                                                  |
| CR after treatment for local recurrence                                           | 0.5    |                                                  |
| CR after treatment for regional recurrence                                        | 0.6    |                                                  |

Abbreviations: CR, complete remission.

## Supplementary Methods

### Plasma EBV DNA quantification

Peripheral blood (3 ml) were obtained in an EDTA tube and centrifuged at 1600 x g for 15 min to isolate plasma and peripheral blood cells. Viral DNA was extracted by the QIAamp Blood Kit (Qiagen, Hilden, Germany). A total of 500 µl plasma sample was used for DNA extraction per column and a final elution volume of 50 µl was utilized to elute the DNA. Plasma EBV DNA concentrations were measured by real-time quantitative polymerase chain reaction (PCR) assay of the BamHI-W region of the EBV genome<sup>1</sup>. The sequences of the forward and reverse primers were: 5`-GCCAG AGGTA AGTGG ACTTT-3` and 5`-TACCA CCTCC TCTTC TTGCT-3` respectively. And the probe was a dual fluorescently-labelled oligomer 5`-(FAM) CACAC CCAGG CACAC ACTAC ACAT (TAMRA)-3`. An Applied Biosystems 7700 Sequence Detector was used for amplifications, which was further analyzed using the Sequence Detection System software (version 1.6.3) of Applied Biosystems (Foster City, CA). The plasma EBV DNA quantifications were calculated using the following equation:  $C=Q\times(V_{DNA}/V_{PCR})\times(1/V_{EXT})$ ; C is the target concentration in plasma (copies/ml), Q is the target quantity (copy number) determined by PCR, V<sub>DNA</sub> is the total volume of DNA obtained after extraction (typically 50 µl/Qiagen extraction), V<sub>PCR</sub> is the volume of DNA solution used for PCR (typically 2 µl) and V<sub>EXT</sub> is the volume of plasma extracted (typically 0.5 ml).

## References

1. Cohen EE, *et al.* American Cancer Society Head and Neck Cancer Survivorship Care Guideline. *CA: a cancer journal for clinicians* **66**, 203-239 (2016).
