# Supplementary material for: An optimal posttreatment surveillance strategy for cancer survivors based on an individualized risk-based approach
Source: PubMed Central journal article supplement (PMC7400511; doi:10.1038/s41467-020-17672-w), 2020-08-03
Supplement: 41467_2020_17672_MOESM3_ESM.pdf [file 41467_2020_17672_MOESM3_ESM.pdf]

## **Description of Additional Supplementary Files**

File Name: Supplementary Software 1

Description: Contains a README.docx file, R codes and simulated datasets as demos.
